# Supplementary material for: What controls the seasonal cycle of columnar methane observed by GOSAT over different regions in India?
Source: Copernicus journal article supplement (doi:10.5194/acp-2017-344), 2017-04-26
Supplement: Supplementary file [file Manuscript_track_change_revised_version.pdf › acp-2017-344-AC1-supplement/Manuscript_track_change_revised_version.pdf]

# What controls the seasonal cycle of columnar methane observed by GOSAT over different regions in India?

Naveen Chandra<sup>1\*</sup>, Sachiko Hayashida<sup>1</sup>, Tazu Saeki<sup>2</sup>, and Prabir K. Patra<sup>2</sup>

<sup>1</sup> Nara Women's University, Kita-Uoya Nishimachi, Nara 630-8506, Japan

<sup>2</sup> Department of Environmental Geochemical Cycle Research, JAMSTEC, Yokohama 2360001, Japan

Correspondence to: Naveen Chandra ([nav.phy09@gmail.com](mailto:nav.phy09@gmail.com))

**Abstract.** Methane ( $\text{CH}_4$ ) is one of the most important short-lived climate forcers for its critical roles in greenhouse warming and air pollution chemistry in the troposphere, and water vapor budget in the stratosphere. It is estimated that up to about 8% of global  $\text{CH}_4$  emissions occur from South Asia, covering less than 1% of global land. With the availability of satellite observations from space, variability in  $\text{CH}_4$  have been captured for most parts of the global land with major emissions, which were otherwise not covered by the surface observation network. However, satellite observations of the columnar dry-air mole fractions of methane ( $\text{XCH}_4$ ) do not allow us to derive emission information straightforwardly, unlike in-situ measurements near the source region, without separating the role of transport and chemistry.  $\text{XCH}_4$  is an integrated measure of  $\text{CH}_4$  densities at all altitudes from surface to the top of the atmosphere. Here, we present an analysis of  $\text{XCH}_4$  variability over different parts of India and the surrounding cleaner oceanic regions of India as measured by the Greenhouse gases, Observation SATellite (GOSAT), and simulated by an atmospheric chemistry-transport model (ACTM). Distinct seasonal variations of  $\text{XCH}_4$  have been observed over the northern (north of  $15^\circ\text{N}$ ) and southern part (south of  $15^\circ\text{N}$ ) of India, corresponding to the peak during southwest monsoon (July-September) and early autumn season (October-December), respectively. Analysis of the transport, emission and chemistry contributions to  $\text{XCH}_4$  using ACTM suggests that distinct  $\text{XCH}_4$  seasonal cycle over northern and southern regions of India is governed by both heterogeneous distributions of surface emissions, and contribution of partial  $\text{CH}_4$  column in the upper troposphere. Over most part of the northern Indian Gangetic Plain regions, up to 40% of the peak during the southwest (SW) monsoon season is attributed to the lower troposphere ( $\sim 1000$ -600 hPa), while  $\sim 40\%$  to uplifted high- $\text{CH}_4$  air masses in the upper troposphere ( $\sim 600$ -200 hPa). In contrast,  $\text{XCH}_4$  seasonal enhancement over the semi-arid western India is attributed mainly ( $\sim 70\%$ ) to the upper troposphere. The seasonal cycle of  $\text{XCH}_4$  over the southern peninsula and oceanic region is contributed up to 60% by the lower tropospheric region. These differences arise due to the complex atmospheric transport mechanisms, caused by the seasonally varying monsoon. The  $\text{CH}_4$  enriched air mass is uplifted from high emission region of the Gangetic Plain by the SW monsoon circulation and deep cumulus convection, and then confined by anticyclonic wind in the upper tropospheric heights ( $\sim 200$  hPa). The anticyclonic confinement of surface emission over a wider South Asia region leads to strong contribution of the upper troposphere in formation of the  $\text{XCH}_4$  peak over most regions in northern India, including the semi-arid regions with extremely low  $\text{CH}_4$  emissions. Based on this analysis, we suggest that a link between surface emissions and higher levels of  $\text{XCH}_4$  is not always valid over Asian monsoon regions, although there is often a fair correlation between surface emissions and  $\text{XCH}_4$ . The overall validity of ACTM simulation for capturing GOSAT observed seasonal and spatial  $\text{XCH}_4$  variability will allow us to perform inverse modelling of  $\text{XCH}_4$  emissions in the future using  $\text{XCH}_4$  data.

|                                                           |
|-----------------------------------------------------------|
| Deleted: (SLCFs)                                          |
| 林田佐智子 6/21/2017 3:37 PM                                   |
| Deleted: according to the United Nation ... [1]           |
| Prabir Patra 6/19/2017 10:43 AM                           |
| Deleted: as well as it plays also a                       |
| 林田佐智子 6/21/2017 3:38 PM                                   |
| Deleted: u... budget in the stratosphere. ... [2]         |
| Naveen Negi 7/3/2017 10:17 AM                             |
| Deleted: The ... however, satellite observ ... [3]        |
| 林田佐智子 6/21/2017 3:42 PM                                   |
| Deleted: along the solar light path betwe ... [4]         |
| Prabir Patra 6/19/2017 10:48 AM                           |
| Deleted: Observations of enhanced XCH ... [5]             |
| 林田佐智子 6/21/2017 3:42 PM                                   |
| Deleted: ies                                              |
| Prabir Patra 6/19/2017 10:50 AM                           |
| Deleted: y                                                |
| Naveen Negi 7/3/2017 10:19 AM                             |
| Deleted: different inland and                             |
| Prabir Patra 6/19/2017 10:50 AM                           |
| Deleted: using ...s measured by the ... [6]               |
| 林田佐智子 6/21/2017 3:48 PM                                   |
| Deleted:                                                  |
| Prabir Patra 6/21/2017 10:14 PM                           |
| Deleted: located in ... the northern (north ... [7]       |
| Naveen Negi 7/3/2017 1:06 PM                              |
| Formatted ... [8]                                         |
| Naveen Negi 6/22/2017 10:55 AM                            |
| Deleted: o                                                |
| Naveen Negi 7/3/2017 1:06 PM                              |
| Formatted ... [9]                                         |
| Naveen Negi 6/22/2017 10:55 AM                            |
| Deleted: 2                                                |
| 林田佐智子 6/21/2017 3:48 PM                                   |
| Formatted ... [10]                                        |
| Prabir Patra 6/19/2017 10:54 AM                           |
| Deleted: ) responsible for $\text{XCH}_4$ season ... [11] |
| Naveen Negi 7/3/2017 10:25 AM                             |
| Deleted: the                                              |
| Prabir Patra 6/19/2017 10:55 AM                           |
| Deleted: , but also distribution of ... and ... [12]      |
| Naveen Negi 6/22/2017 11:07 AM                            |
| Deleted: 6                                                |
| Prabir Patra 6/19/2017 10:59 AM                           |
| Deleted: atmosphere                                       |
| Naveen Negi 6/22/2017 11:07 AM                            |
| Deleted: 88%                                              |
| Prabir Patra 6/19/2017 11:00 AM                           |
| Deleted: attributed ... o the upper atmos ... [13]        |
| Naveen Negi 7/3/2017 10:27 AM                             |
| Deleted: ratios of contribution changed ... [14]          |
| Prabir Patra 6/19/2017 11:02 AM                           |
| Deleted: es... uplifted from high emissi ... [15]         |
| Naveen Negi 7/3/2017 10:36 AM                             |
| Moved (insertion) [1]                                     |
| Naveen Negi 7/3/2017 10:36 AM                             |
| Moved up [1]: The overall validity of ... [17]            |

## 1. Introduction

Methane (CH<sub>4</sub>) is the second most important anthropogenic greenhouse gas (GHG) after carbon dioxide (CO<sub>2</sub>) and accounts for ~20% (+0.97 W m<sup>-2</sup>) of the increase in total direct radiative forcing, since 1750 (Myhre et al., 2013). CH<sub>4</sub> is emitted from a range of anthropogenic and natural sources on the Earth's surface into the atmosphere. The main natural sources of CH<sub>4</sub> include wetlands and termites (Matthews and Fung, 1987; Cao et al., 1998; Sugimoto et al., 1998). Livestock, rice cultivation, fossil fuel industry (production and uses of natural gas, oil and coal) and landfills are the major sectors among the anthropogenic sources (Crutzen et al., 1986; Minami and Neue, 1994; Olivier et al., 2006). These results also suggest that the Asia region is emission hotspot of CH<sub>4</sub> due to large number livestock, intense cultivation, coal mining, waste management and other anthropogenic activities (EDGAR2FT, 2013).

With a short atmospheric lifetime of about 10 years (e.g., Patra et al., 2011a) and having 34 times more potential to trap heat than CO<sub>2</sub> on mass basis over a 100-year timescale (IPCC AR5), mitigation of CH<sub>4</sub> emissions could be the most important way to limit global warming at inter-decadal time scales (Shindell et al., 2009). Better knowledge of CH<sub>4</sub> distribution and quantification of its emission flux is indispensable for assessing possible mitigation strategies. However, sources of CH<sub>4</sub> are not yet well quantified due to sparse ground based measurements, which results in limited representation on a larger scale (Dlugokencky et al., 2011; Patra et al., 2016). Recent technological advances have made it possible to detect spatial and temporal variations in atmospheric CH<sub>4</sub> from space (Frankenberg et al., 2005; Kuze et al., 2009), which could fill the gaps left by ground, aircraft and ship-based measurements, albeit at a lower accuracy than the in situ measurements. Further, despite the satellite observations having an advantage of providing continuous monitoring over a wide spatial range, the information obtained from passive nadir-sensors that use solar radiation at Short-Wavelength Infrared (SWIR) spectral band, is limited to columnar dry-air mole fractions of methane (XCH<sub>4</sub>). This is an integrated measure of CH<sub>4</sub> with contributions from the different vertical atmospheric layers, i.e., from the measurement point on the Earth's surface to the top of the atmosphere (up to about 100km or more precisely to the satellite orbit).

The Indian region exerts a significant impact on the global CH<sub>4</sub> emissions, with 37±3.7 Tg-CH<sub>4</sub> of about 500 Tg-CH<sub>4</sub> during the 2000s is emitted from the South Asia region consisting of India, Pakistan, Bangladesh, Nepal, Bhutan and Sri Lanka (Patra et al., 2013). The Indo-Gangetic Plain (IGP), located in the foothills of the Himalayas, is one of the most polluted regions in the world, hosts 70% of coal-fired thermal power plants in India and experience intense agricultural activity (Kar et al., 2010). This region is of particular interest mainly due to the coexistence of deep convection and large emission of pollutants (including CH<sub>4</sub>) from a variety of natural and anthropogenic sources. Rainfall during the SW monsoon season cause higher CH<sub>4</sub> emissions from the paddy fields and wetlands (e.g., Matthews and Fung, 1987; Yan et al., 2009; Hayashida et al., 2013) while the persistent deep convection results the updraft of CH<sub>4</sub>-laden air mass from surface to the upper troposphere during the same season, where CH<sub>4</sub> is further spread over larger region by the anticyclonic winds (Patra et al., 2011b; Baker et al., 2012; Schuck et al., 2012). Several studies highlighted the role of convective transport of pollutants (including CH<sub>4</sub>) from surface to the upper troposphere (400 – 200 hPa) during SW monsoon season (July-September) (Park et al., 2004; Randel et al., 2006; Xiong et al., 2009; Patra et al., 2011b; Baker et al., 2012; Schuck et al., 2012; Lal et al., 2014; Chandra et al., 2016). The dynamical system dominated by deep convection and anticyclone cover mostly the northern Indian region (north of 15°N) due to the presence of the Himalayas and the Tibetan Plateau, while such complex dynamical system has not been observed over the southern part of India (south of 15°N) (Rao, 1976).

Naveen Negi 7/3/2017 10:37 AM

Deleted: ally produced

林田佐智子 6/21/2017 4:00 PM

Deleted:

Prabir Patra 6/19/2017 12:02 PM

Deleted: ; EDGAR2FT, 2013

Naveen Negi 6/23/2017 11:52 AM

Deleted: per molecule

Naveen Negi 7/3/2017 10:46 AM

Formatted: Not Highlight

Naveen Negi 7/3/2017 10:42 AM

Deleted: in

Naveen Negi 7/3/2017 10:44 AM

Deleted: -based

Prabir Patra 6/19/2017 11:46 AM

Deleted: Although

Prabir Patra 6/19/2017 11:58 AM

Deleted: e

Prabir Patra 6/19/2017 11:46 AM

Deleted: the

Naveen Negi 7/3/2017 10:44 AM

Deleted: region

Prabir Patra 6/19/2017 11:59 AM

Deleted: .

林田佐智子 6/21/2017 4:13 PM

Deleted: for molecular CH<sub>4</sub>)

Prabir Patra 6/19/2017 11:48 AM

Formatted: Subscript

Satellite-based measurements show elevated levels of  $\text{XCH}_4$  over the northern part of India (north of  $15^\circ\text{N}$ ) particularly high over IGP during the SW monsoon season (July to September) and over southern India (south of  $15^\circ\text{N}$ ) during early autumn season (October to December) (Frankenberg et al., 2008, 2011; Hayashida et al., 2013). Previous studies have linked these high  $\text{XCH}_4$  levels to the strong surface  $\text{CH}_4$  emissions particularly from the rice cultivation over the Indian region, because they showed statistically significant correlations over certain regions (Hayashida et al., 2013; Kavitha et al., 2016). The differences in the peak of  $\text{XCH}_4$  seasonal cycle over northern and southern regions of India are discussed on the basis of agricultural practice in India that takes place in two seasons, May to October, and November to April, respectively. However, inferring local emissions directly from variations in  $\text{XCH}_4$  is ambiguous, particularly over the Indian regions under the influence of monsoon meteorology, because  $\text{XCH}_4$  involves contributions of  $\text{CH}_4$  abundances from all altitudes along the solar light path. Though, vertically resolving retrieval products of  $\text{CH}_4$  are available from the Thermal InfraRed (TIR) channel of GOSAT, but these products are still under validation (e.g., Zou et al., 2016; Olsen et al., 2017). The other infrared sensors such as Atmospheric Infrared Sounder (AIRS), Tropospheric Emission Spectrometer (TES) and Infrared Atmospheric Sounding Interferometer (IASI) are not sufficiently sensitive to the lower troposphere (e.g., Worden et al., 2015).

This study attempts for the first time to separate the factors responsible (emission, transport and chemistry) for the distributions of columnar methane ( $\text{XCH}_4$ ) over the Asian monsoon region for different altitude segments. The  $\text{XCH}_4$  mixing ratios are used for this study as observed from the GOSAT and simulated by JAMSTEC's ACTM. We aim to understand relative contributions of surface emissions and transport in formation of  $\text{XCH}_4$  seasonal cycles over different parts of India and the surrounding oceans. This understanding will help us towards making an inverse modelling system for estimation of  $\text{CH}_4$  surface emissions using  $\text{XCH}_4$  observations and ACTM forward simulation.

## 2. Methods

### 2.1 Satellite data:

The Greenhouse gases Observing SATellite (GOSAT) (also referred to as Ibuki) is a joint satellite project of the National Institute of Environmental Studies (NIES), Ministry of the Environment (MOE) and Japan Aerospace Exploration Agency (JAXA). It has been providing columnar dry air mole fractions of the two important greenhouse gases ( $\text{XCH}_4$  and  $\text{XCO}_2$ ) at near global coverage since its launch in January 2009. It is equipped onboard with the Thermal And Near infrared Sensor for carbon Observation-Fourier Transform Spectrometer (TANSO-FTS) and the Cloud and Aerosol Imager (TANSO-CAI) (Kuze et al., 2009). To avoid cloud contamination in the retrieval process, any scene with more than one cloudy pixel within the TANSO-FTS IFOV is excluded. The atmospheric images from CAI are used to identify the cloudy pixels. As a result of this strict screening, only limited numbers of  $\text{XCH}_4$  data are available during the SW monsoon over South Asia. This study uses the GOSAT SWIR  $\text{XCH}_4$  (Version 2.21)-Research Announcement product for the period of 2011-2014. The ground-based FTS measurements of  $\text{XCH}_4$  by the Total Carbon Column Observing Network (TCCON) (Wunch et al., 2011) are used extensively to validate the GOSAT retrievals. Retrieval bias and precision of column abundance from GOSAT SWIR observations have been estimated as approximately 15-20 ppb and 1%, respectively for the NIES product using TCCON data (Morino et al., 2011; Yoshida et al., 2013).

### 2.2. Model simulations

Naveen Negi 7/3/2017 10:42 AM

Deleted: The Indian region exerts a significant impact on the global  $\text{CH}_4$  emissions (Patra et al., 2013). The Indo-Gangetic Plain (IGP), mostly hot and humid northeast region lies in the foothills of the Himalayas, is one of the most polluted regions in the world due to the high population density, heavy industries, power plants that hosts 70% of coal-fir [18]

林田佐智子 6/21/2017 4:16 PM

Deleted: season ... Frankenberg et al., [19]

Naveen Negi 7/3/2017 11:03 AM

Deleted: related ... ave linked these hig [20]

林田佐智子 6/21/2017 4:26 PM

Deleted: namely the Kharif... (ay to [21]

Prabir Patra 6/19/2017 12:25 PM

Deleted: the...local emissions to the hi [22]

Naveen Negi 7/3/2017 11:05 AM

Deleted: because  $\text{XCH}_4$ , which involve [23]

Prabir Patra 6/19/2017 12:27 PM

Deleted: is highly ambiguous, ...articu [24]

Naveen Negi 7/3/2017 11:06 AM

Deleted: The

Prabir Patra 6/19/2017 12:31 PM

Deleted: re are some...other infrared se [25]

Naveen Negi 7/3/2017 11:20 AM

Deleted: ...nfrared Atmospheric Soun [26]

Prabir Patra 6/19/2017 12:32 PM

Deleted: , which could provide some [27]

林田佐智子 6/21/2017 4:33 PM

Deleted: (approximately bias ~ 65 ppb)

Prabir Patra 6/19/2017 12:35 PM

Deleted: Some studies have been done [28]

Naveen Negi 7/3/2017 11:07 AM

Deleted: manuscript ...study attempts fo [29]

Prabir Patra 6/19/2017 12:36 PM

Deleted: The main conclusion drawn fr [30]

Prabir Patra 6/19/2017 12:41 PM

Deleted: called ...Iso referred to as Ibul [31]

Naveen Negi 7/3/2017 11:29 AM

Deleted: with onboard the

林田佐智子 6/21/2017 4:41 PM

Deleted: thermal and near infrared sens [32]

Prabir Patra 6/21/2017 10:19 PM

Deleted: is removed if ...ith more than [33]

Naveen Negi 6/22/2017 11:13 AM

Deleted: The cloudy pixels are identifi [34]

林田佐智子 6/21/2017 4:50 PM

Deleted: Cloudy data is strictly screenc [35]

Naveen Negi 7/3/2017 11:30 AM

Deleted: season ...ver South Asia. This [36]

Prabir Patra 6/19/2017 12:47 PM

Deleted: ....obtained using the worldw [37]

Model analysis is comprised of simulations from the [JAMSTEC's](#) atmospheric general circulation model (AGCM)-based chemistry-transport model (ACTM; Patra et al., 2009). The AGCM was developed by the Center for Climate System Research/National Institute for Environmental Studies/Frontier Research Center for Global Change (CCSR/NIES/FRCGC). It has been a part of the [transport model inter-comparison experiment TransCom-CH<sub>4</sub>](#) (Patra et al., 2011a) and used in inverse modeling of CH<sub>4</sub> emissions (Patra et al., 2016). The ACTM runs at a horizontal resolution of T42 spectral truncations (~2.8° × 2.8°) with 67 sigma-pressure vertical levels. The evolution of CH<sub>4</sub> at different longitude (x), latitude (y) and altitude (z) with time in the Earth's atmosphere depends on the surface emission, chemical loss and transport, which can be mathematically represented by the following continuity equation:

$$\frac{dCH_4(x, y, z, t)}{dt} = S_{CH_4}(x, y, t) - L_{CH_4}(x, y, z, t) - \nabla \cdot \phi(x, y, z, t)$$

where

CH<sub>4</sub> = methane molar fraction in the atmosphere

S<sub>CH<sub>4</sub></sub> = Total emissions/sinks of CH<sub>4</sub> at the surface

L<sub>CH<sub>4</sub></sub> = Total loss of CH<sub>4</sub> in the atmosphere due to the chemical reactions

∇ · φ = Transport of CH<sub>4</sub> due to the advection, convection and diffusion.

The meteorological fields of ACTM are nudged with reanalysis data from the Japan Meteorological Agency, version JRA-25 (Onogi et al., 2007). The model uses an [optimal](#) OH field (Patra et al., 2014) based on a scaled version of the seasonally varying OH field (Spivakovsky et al., 2000). The [a priori](#) anthropogenic emissions are from Emission Database for Global Atmospheric Research (EDGAR) v4.2 FT2010 database (<http://edgar.jrc.ec.europa.eu>). [The model sensitivity for emission is examined by two cases of emission scenarios based on different combination of sectorial emissions.](#) First one [referred by the AGS](#), where all emission sectors in EDGAR42FT are kept a constant value for 2000, except for emissions from agriculture soils. The second one is controlled emission scenario referred by CTL, which is based on the ensemble of the anthropogenic emissions from EDGAR32FT (as in Patra et al., 2011a), wetland and biomass burning emissions from Fung et al (1991) and rice paddies emission from Yan et al (2009). [The emission seasonality differs substantially between the CTL case and the AGS case due to differences in emissions from wetlands, rice paddies and biomass burning; other anthropogenic emissions do not contain seasonal variations \(Patra et al., 2016\).](#) Further details about the model and these emission scenarios can be found in the previous studies (Patra et al., 2009; Patra et al., 2011a; Patra et al., 2016).

XCH<sub>4</sub> is calculated from the ACTM profile using following equations:

$$XCH_4 = \sum_{n=1}^{60} CH_4(n) \times \Delta\sigma_p(n)$$

where, CH<sub>4</sub>(n) is the dry-air mole fraction at model mid-point level, n = number of vertical sigma pressure layers of ACTM (= 1-60 with σ<sub>p</sub> values of 1.0 and 0.005), Δσ<sub>p</sub> = thickness of sigma pressure level. Note here that we have not incorporated convolution of model profiles with retrieval a priori and averaging kernels. [Because the averaging kernels are nearly constant in the troposphere \(Yoshida et al., 2011\), hence this approximation does not lead to serious errors in constructing the model XCH<sub>4</sub>.](#) The seasonal distributions of partial columnar CH<sub>4</sub> (denoted by X<sub>p</sub>CH<sub>4</sub>) for a thickness of 0.2 sigma pressure layers are used to understand the contribution of different layers to the total XCH<sub>4</sub> seasonal cycle. For both the CTL and AGS cases, we adjust a constant offset of 20 ppb to the modeled time series, which should make the a priori correction have a lesser impact on the

Prabir Patra 6/19/2017 1:43 PM  
Deleted: well-established...AMSTEC' [38]

Naveen Negi 7/3/2017 11:31 AM  
Deleted: and...mathematically can be [39]

Prabir Patra 6/19/2017 1:45 PM  
Deleted: optimized ...ptimal OH field [40]

林田佐智子 6/23/2017 12:08 PM  
Comment [1]: I cannot follow the sent [45]

Naveen Negi 6/22/2017 11:30 AM  
Deleted: T...o different ...ases of emis [41]

Naveen Negi 7/3/2017 11:33 AM  
Deleted: is the ACTM ...eferred by th [46]

林田佐智子 6/21/2017 5:46 PM  
Formatted [42]

Prabir Patra 6/21/2017 10:22 PM  
Formatted [43]

林田佐智子 6/21/2017 5:46 PM  
Formatted [44]

林田佐智子 6/21/2017 5:48 PM  
Comment [2]: Seasonality in emission [47]

Prabir Patra 6/19/2017 1:46 PM  
Deleted: the...following [48]

Prabir Patra 6/19/2017 1:47 PM  
Deleted: 2...<sup>0</sup> CH<sub>4</sub> (n) ×\* ...Δ [(...<sub>p</sub> (n) [49]

Prabir Patra 6/19/2017 1:49 PM  
Deleted: For the first layer (n =1) - [50]

Prabir Patra 6/23/2017 12:11 PM  
Comment [3]: Check and give an accur [54]

Prabir Patra 6/23/2017 1:04 PM  
Comment [4]: DID YOU CHECK???

Prabir Patra 6/23/2017 1:05 PM  
Formatted [53]

Prabir Patra 6/23/2017 1:05 PM  
Formatted [55]

Prabir Patra 6/23/2017 1:05 PM  
Formatted [56]

Prabir Patra 6/19/2017 2:00 PM  
Moved (insertion) [2] [57]

Naveen Negi 7/3/2017 11:35 AM  
Deleted: However, as sensitivity study [51]

Prabir Patra 6/19/2017 2:00 PM  
Deleted: (AKs)

Naveen Negi 7/3/2017 11:35 AM  
Deleted: uniform

林田佐智子 6/21/2017 4:52 PM  
Formatted [52]

林田佐智子 6/21/2017 4:52 PM  
Deleted: 3

Prabir Patra 6/19/2017 2:01 PM  
Deleted: and X<sub>p</sub>CH<sub>4</sub> in the tropical reg [58]

Prabir Patra 6/19/2017 2:00 PM  
Moved up [2]: Because the averaging [59]



model XCH<sub>4</sub>. Because the focus of this study is seasonal and spatial variations in XCH<sub>4</sub>, a constant offset adjustment should not affect the main conclusions. XCH<sub>4</sub> data are sampled at the nearest model grid from the available observations and satellite overpass time (~ 1300 hrs LT) and then averaged over the selected partitions of the study region (Figure 2a).

### 3. Results and discussion

#### 3.1 XCH<sub>4</sub> over the Indian region: View from GOSAT and ACTM simulations

This section presents an analysis of XCH<sub>4</sub> observed by GOSAT from Jan 2011 to Dec 2014 over the Indian region. We characterize the 4 seasons specific to the region as winter (January to March), spring (April to June), summer (July to September) or the SW monsoon, and autumn (October to December). Since general features of XCH<sub>4</sub> simulated by ACTM using emission scenarios AGS and CTL are similar to each other, the main discussion is made using AGS scenario only. Figure 1a-b show that the XCH<sub>4</sub> mixing ratios are lower during the spring season and higher during the autumn season. A strong latitudinal gradient in XCH<sub>4</sub> is observed between the Indo-Gangetic Plain (IGP) and the other parts of India. XCH<sub>4</sub> show the highest value (~1880 ppb) over the IGP, eastern and northeast Indian regions. As seen from Figure 1c-d, ACTM simulations are able to reproduce the observed latitudinal and seasonal gradients in XCH<sub>4</sub>; i.e., higher values during the southwest monsoon and autumn seasons and lower values during the winter and spring seasons over the IGP region. The optimized total CH<sub>4</sub> fluxes (AGS and CTL) show high emissions over the IGP region and northeast Indian regions (Figure 1e-f). Most elevated levels of XCH<sub>4</sub> are often observed simultaneously with the higher emissions, suggesting a link between the enhanced XCH<sub>4</sub> and high surface emissions in the summer season. However, this connection is not valid over all locations. For example, over western and southern region of India, XCH<sub>4</sub> is higher in Autumn than in Spring, though the emissions are higher in Spring.

To study the seasonal XCH<sub>4</sub> pattern in details depending on the distinct spatial pattern of surface emissions and XCH<sub>4</sub> mixing ratios shown in Figure 1, the Indian landmass was partitioned into eight sub-regions: Northeast India (NEI), Eastern India (EI), Eastern IGP (EIGP), Western IGP (WIGP), Central India (CI), Arid India (AI), Western India (WI), Southern Peninsula (SP), and two surrounding oceanic regions, the Arabian Sea (AS) and Bay of Bengal (BOB) (Figure 2a). Regional divisions are made based on spatial patterns of emission and XCH<sub>4</sub> (Figure 1a-f), and our knowledge of seasonal meteorological conditions. Figure 2b-k shows ACTM - GOSAT comparisons of XCH<sub>4</sub> time series from Jan 2011 to Dec 2014 over the selected study regions. The climatological mean resulting from the time series shown in Figure 2 is provided in the supplementary information (Figure S1). Observations are limited during the SW monsoon season due to GOSAT retrieval limitations under cloud cover. The model captures the salient features in the seasonal cycles at very high statistical significance as indicated by the high correlation coefficients ( $r > 0.6$ ) over the selected regions (refer to supplementary Table S1). As shown in Table S1, the highest correlation coefficients between the GOSAT measurements and ACTM simulations are obtained over SP region and also over oceanic regions (AS and BOB). The high ACTM-GOSAT correlations for the low/no emission regions suggest that transport and chemistry are accurately modeled in ACTM. Although we do not have statistically significant number of observations for the SW monsoon period, the GOSAT data showing high XCH<sub>4</sub> during this period were generally well simulated by ACTM over most of the study regions. Based on these comparisons, we can assume that model simulations can be used to understand XCH<sub>4</sub> variability over the India region. Though we showed only the pairs of data of GOSAT and ACTM that matched in time and location in Figure 2, we also confirmed that the correlation is high ( $r \sim 0.9$ ) between the averaged time series over different regions with and without sampling of model at the location and time of GOSAT sampling. This high correlation assures representativeness of the data shown in Figure 2. Thus, the seasonal evolution of XCH<sub>4</sub> using the ACTM simulations alone is

Prabir Patra 6/19/2017 2:09 PM

Deleted: mixing ratios ...bserved by G... [60]

Naveen Negi 7/3/2017 11:39 AM

Deleted: southwest

Prabir Patra 6/19/2017 2:04 PM

Deleted: summer...monsoon"...and at... [61]

Naveen Negi 7/3/2017 11:40 AM

Deleted: remainder

Prabir Patra 6/19/2017 2:13 PM

Deleted: mixing ratios ...how the high... [62]

Naveen Negi 6/22/2017 11:50 AM

Deleted: shows

Prabir Patra 6/19/2017 2:16 PM

Deleted: the...high emissions over the IGP region and northeast Indian regions (Figure 1e-f). Most elevated levels of XCH<sub>4</sub> are often observed simultaneously with the higher emissions, suggesting a direct connecti... [63]

林田佐智子 6/21/2017 5:03 PM

Deleted: apparently

Naveen Negi 6/22/2017 11:51 AM

Deleted: western region(...egion ?) [64]

Naveen Negi 6/22/2017 11:50 AM

Formatted: Subscript

Naveen Negi 6/22/2017 11:46 AM

Deleted: .....

林田佐智子 6/21/2017 5:05 PM

Deleted: For example, the emissions flux has been observed asare higher during the spring season than the autumn season over most of the Indian region. In contrast, while higher levels of XCH<sub>4</sub> are observed during the autumn season as compared to the that during spring season. These inconsistencies give the hint of other factors, transport and chemistry, responsible for the XCH<sub>4</sub> distribution, apart from the emissions, over the Indian region.

Naveen Negi 6/23/2017 10:29 AM

Deleted: place?

Naveen Negi 6/23/2017 10:30 AM

Formatted: Subscript

Naveen Negi 7/3/2017 11:43 AM

Deleted: monthly ...can resulting from... [65]

林田佐智子 6/21/2017 5:17 PM

Deleted: both tracers show, ...he high... [66]

Naveen Negi 7/3/2017 11:44 AM

Deleted: few

Prabir Patra 6/19/2017 2:26 PM

Deleted: that...during this period were... [67]

Naveen Negi 6/22/2017 12:12 PM

Deleted: of all ACTM simulations and those sampled with GOSAT.

林田佐智子 6/21/2017 5:25 PM

Deleted: We confirmed that the model... [68]

expected to be fairly valid for different altitude layers (ref. to Patra et al., 2011b for comparison at the aircraft cruising altitude). Though the model is only validated for  $\text{XCH}_4$  in this study, comparisons with surface and aircraft  $\text{CH}_4$  observations have been shown in Patra et al. (2016).

### 3.2 Seasonal cycle of $\text{XCH}_4$ and possible controlling factors

As mentioned earlier, that the persistent deep convection and mean circulation during the SW monsoon season significantly enhance  $\text{CH}_4$  in the upper troposphere (e.g., Xiong et al., 2009, Baker et al., 2012), coinciding with the period of high surface  $\text{CH}_4$  emissions due to rice paddy cultivation and wetlands over the Indian region (Yan et al., 2009; Hayashida et al., 2013). Both these emission and transport processes contribute greatly to seasonal changes in  $\text{XCH}_4$ , although their relative contributions have not been studied over the monsoon dominated Indian region. For understanding the role of transport, the atmospheric column is segregated into five sigma-pressure ( $\sigma_p$ ) layers, starting from the surface level ( $\sigma_p = 1$ ) to top of the atmosphere ( $\sigma_p = 0$ ) with an equal spacing of 0.2. The layers bounded by the boundaries between 1.0-0.8, 0.8-0.6, 0.6-0.4, 0.4-0.2, and 0.2-0.0 of sigma pressure are denoted by LT, MT1, MT2, UT and UA, respectively. The partial columnar  $\text{CH}_4$  are calculated within different  $\sigma_p$  layers (denoted by  $\text{X}_p\text{CH}_4$ ) using the same formula for  $\text{XCH}_4$  as in Section 2.2. The model results are averaged over each sub-region of our analysis for  $\text{XCH}_4$  seasonal cycle. For understanding the role of surface emission in formation of  $\text{XCH}_4$  seasonal cycle, the climatology of optimized total  $\text{CH}_4$  flux for each sub-region are used. Figure 3 shows the climatology (2011-2014) of total  $\text{CH}_4$  flux,  $\text{XCH}_4$  and  $\text{X}_p\text{CH}_4$  from the model averaged over three selected regions, EIGP, SP and AI. The observed GOSAT  $\text{XCH}_4$  values are also shown for comparison. However note that this comparison is just for a reference because the model results are not collocated with sampling location and time of GOSAT, which is different from the case in Figure 2. These representative regions have been selected because they show distinct  $\text{XCH}_4$  seasonal cycles and the dominant controlling factors (such as emission, transport and chemistry) responsible for them. The figures for the remaining seven regions are available in the supplementary information document (Figures S2, S3).

Over the EIGP region, magnitude and timing of seasonal peak in emission differ substantially between the CTL and AGS emission scenarios (ref. Figure 3g). ACTM simulated  $\text{XCH}_4$  seasonal peak is in agreement with peak in emission in June for AGS case and in August for CTL case (Figure 3f). However, simulated  $\text{XCH}_4$  remains nearly constant until September, although the emission decreases substantially toward winter. In general, emission is relatively higher in monsoon season (July-August-September) than in other seasons in both cases. However, in the LT, where we expect most susceptible to the surface emission, the partial column  $\text{CH}_4$  indicates very different seasonality from the emissions;  $\text{X}_p\text{CH}_4$  (LT) increases toward winter continuously (Figure 3e). The partial  $\text{CH}_4$  columns for the upper troposphere and middle troposphere (Figure 3b-c) show similar seasonality to the total  $\text{XCH}_4$  rather than in the LT. Therefore, this analysis strongly suggest that both the emissions on Earth's surface and the upper tropospheric partial column contribute to the formation of  $\text{XCH}_4$  seasonal cycle. These results also suggest the possibility that GOSAT and ACTM  $\text{XCH}_4$  data can be used for correcting a priori emission scenarios by inverse modeling.

In contrast to the  $\text{XCH}_4$  seasonal cycle over EIGP, a notable difference is observed in the emission and  $\text{XCH}_4$  seasonal cycle over the SP region (Fig. 2h-n). The  $\text{XCH}_4$  seasonal cycle and emission seasonal cycle are found to be out of phase with each other and the differences in emission scenarios are not reflected in  $\text{XCH}_4$  seasonal variations. Both emission scenarios show distinct seasonal pattern; AGS shows annual high emissions from April to September, while CTL shows annual high during August-September (Figure 3n). It should be noted that the total emissions are much lower than that of EIGP (note the different y-axis

- Deleted: ,
- Naveen Negi 7/3/2017 11:46 AM
- Deleted: .
- 林田佐智子 6/21/2017 5:29 PM
- Deleted: while
- Prabir Patra 6/21/2017 10:29 PM
- Deleted: we showed also
- 林田佐智子 6/21/2017 5:31 PM
- Deleted: and
- Naveen Negi 7/3/2017 11:46 AM
- Formatted
- 林田佐智子 6/21/2017 5:31 PM
- Deleted: (...atra et al. , ...
- Naveen Negi 7/3/2017 11:49 AM
- Deleted: As mentioned in introduction.
- Prabir Patra 6/19/2017 2:36 PM
- Deleted: mixing ratios...are calculated
- 林田佐智子 6/21/2017 5:38 PM
- Deleted: the 8
- Prabir Patra 6/19/2017 2:39 PM
- Deleted: in the... $\text{XCH}_4$  annual ...eason
- Naveen Negi 7/3/2017 11:51 AM
- Deleted: The climatology of optimized
- Prabir Patra 6/19/2017 2:42 PM
- Deleted: climatology of ... $\text{CH}_4$  and  $\text{X}_p$
- Naveen Negi 7/3/2017 11:52 AM
- Deleted: . Note here that the observed
- 林田佐智子 6/21/2017 5:40 PM
- Formatted
- Prabir Patra 6/23/2017 1:12 PM
- Deleted: distinct
- Naveen Negi 7/3/2017 1:07 PM
- Formatted
- Naveen Negi 6/22/2017 12:22 PM
- Deleted: responsible
- Naveen Negi 7/3/2017 1:07 PM
- Formatted
- Prabir Patra 6/19/2017 2:46 PM
- Deleted: The remaining regions follow
- Naveen Negi 7/3/2017 11:54 AM
- Deleted: 5
- Prabir Patra 6/19/2017 3:27 PM
- Deleted: Further, differences in the  $\text{X}_p$
- Naveen Negi 7/3/2017 11:54 AM
- Deleted: the emission seasonality differ
- 林田佐智子 6/21/2017 6:51 PM
- Formatted
- 林田佐智子 6/21/2017 7:15 PM
- Deleted: Further, the  $\text{X}_p\text{CH}_4$  seasonal c
- 林田佐智子 6/21/2017 7:14 PM
- Formatted
- Naveen Negi 7/3/2017 11:56 AM
- Deleted: seasonal cycle
- Prabir Patra 6/19/2017 3:12 PM
- Deleted: observed incompatible...ound
- 林田佐智子 6/21/2017 7:18 PM
- Deleted: s
- Prabir Patra 6/21/2017 10:37 PM
- Deleted: e...be notable...d that the abs

scale of emissions in Figure 3n) and hence the difference between the  $XCH_4$  simulations from both emission scenarios is comparatively low. The  $XCH_4$  shows almost identical seasonal cycles for both emission scenarios, a peak in October and prolonged low values during May to September. The seasonal  $X_pCH_4$  cycle in the LT layer shows seasonal pattern similar to the total  $XCH_4$ . Inconsistency between emission seasonality and  $XCH_4$  coupled with low emissions strongly suggests that the  $XCH_4$  can be controlled by transport and/or chemistry, not emission. Surface winds from May to September over SP are from the southern hemisphere, which effectively flushes the air with low  $CH_4$  and pushes the polluted air masses from the south to the north India region (ref. Figure S4). Further, the distinct seasonal cycle of chemical loss is observed over the SP region (ref. Figure S5) compared to other study regions; the loss rate starts increasing from 6 ppb day<sup>-1</sup> in January to 12 ppb day<sup>-1</sup> in April, reaching a plateau from April to September (~12 ppb day<sup>-1</sup>). These evidences clearly suggest that the combined effect of transport and chemistry causes the low  $XCH_4$  values for the May-September period over the SP region. The peaks in the upper layers (Figure 3k-h) in October and transport from polluted continental layer in the LT layer (ref. Figure S4) could together contribute to the seasonal  $XCH_4$  peak over SP. As shown here clearly that, the  $XCH_4$  measurements do not allow us derive a strong constraint on surface emissions in the inverse analysis over the southern India region, suggesting a need for in situ measurements.

Over the Arid Indian (AI) region,  $XCH_4$  seasonal cycle is observed to be different from those of the EIGP and SI regions. The simulated  $XCH_4$  (Figure 3t) show extremely weak sensitivity to the surface emission differences between the AGS and CTL cases (Figure 3u). Additionally, the  $X_pCH_4$  in the LT layer (Figure 3s), which must follow the surface emission, does not resemble with the phase of seasonal surface emissions and simulated  $XCH_4$ . The  $X_pCH_4$  in the LT layer decreases from Jan to August and increases until December. On the other hand, in  $XCH_4$ , a remarkable peak (~1896 ppb) is observed in August followed a decline afterward (Figure 3t). This is an outstanding example of deceiving linkage between surface emissions and  $XCH_4$  in terms of seasonal variation. An enhancement in the mixing ratios of  $X_pCH_4$  is observed from May to August only in the MT2 and UT layers (Figure 3p-q) and from June to August in the UA layer (Figure 3o). This analysis infers that MT2 and UT partial columns mostly contribute in the formation of  $XCH_4$  seasonal cycle over AI region.

Next, we quantify the contributions of different partial layers ( $X_pCH_4$ ) in formation of  $XCH_4$  seasonal amplitude. We calculate the differences of the  $X_pCH_4$  values at the time of peak and trough of the  $XCH_4$  seasonal cycle over each region taken from ACTM simulations (Figure 4). Note that the phase of  $X_pCH_4$  seasonal variation do not match always with that of  $XCH_4$ , thus the fixed timing of peak and trough in  $XCH_4$  is used for all of the  $X_pCH_4$  time series. Further, these differences at different partial layers are divided by seasonal amplitude of  $XCH_4$  and then multiplied by 100 for calculating the percentage contributions from respective layers into the seasonal amplitude of  $XCH_4$ . These results reveal that ~40% of the seasonal enhancement in the observed  $XCH_4$  can be attributed to the partial pressure layers below 600 hPa (LT and MT1) for EIGP region, which are directly influenced by the surface emissions (Figure 4). About 40% in seasonal enhancement comes from layers above 600 hPa. Over the SP region, about 60% of the seasonal  $XCH_4$  amplitude is attributed to layers below 600 hPa and remaining 40% results from the upper layers. Although the activities in the lower atmosphere (below 600 hPa) govern most of the seasonal  $XCH_4$  cycle over this region, there is not clear link with seasonal variations in emissions as this region is under greater influence of changes in monsoon meteorology. These regions are under the influence of emission signals from the Indian subcontinent during winter; while in the summer, clean marine air control  $CH_4$  levels (see also Patra et al., 2009). In contrast to the two regions mentioned above, over the AI region, the LT and MT1 layers together contribute only about 12% to the formation of  $XCH_4$  seasonal cycle

Prabir Patra 6/19/2017 3:14 PM

**Deleted:** On the other hand, being simulated from distinct emissions scenarios having different seasonal cycles, the  $XCH_4$  s... [88]

林田佐智子 6/21/2017 7:20 PM

**Deleted:** over SP ...hows seasonal patt... [89]

林田佐智子 6/21/2017 7:25 PM

**Deleted:**

林田佐智子 6/21/2017 7:26 PM

**Formatted**

Prabir Patra 6/21/2017 10:38 PM

**Deleted:** ation...and/or chemistry, not... [91]

林田佐智子 6/21/2017 7:30 PM

**Deleted:** Apparently

Prabir Patra 6/19/2017 3:21 PM

**Deleted:** Over the SP region, about 60% of the seasonal  $XCH_4$  amplitude is attributed to layers below 600 hPa and remaining 40% results from the other layers (Figure 4). In summary, activities, dominated in the atmosphere below 600 hPa, govern most of the  $XCH_4$  seasonal cycle over this region.

Naveen Negi 7/3/2017 12:02 PM

**Deleted:** Over the Arid India (AI) region, the seasonal  $XCH_4$  cycle is different from those of the EIGP and SI regions. At a first glance, it seems the  $XCH_4$  simulations (Figure 3t) follow the emission pattern over the AI region (Figure 3u) but the simulated  $XCH_4$  show extremely weak sensitivity to the surface emission differences between the AGS and CTL cases. However in contrast to other cases mentioned above, addition the  $X_pCH_4$  in the LT layer (Figure 3s) that must be mostly affected by surface emission, does not resemble the phase of seasonal  $XCH_4$  pattern over the AI region. The  $X_pCH_4$  in the LT layer (Figure 4s) decreases from Jan to August and increases until December. On the other hand, in  $XCH_4$ , a significant peak (~1896 ppb) is observed in August followed a decline afterward (Figure 3t). This is an outstanding example of deceiving, indicating no linkage between surface emissions and  $XCH_4$  in terms of seasonal peakvariability variation. An enhancement in the mixing ratios of  $X_pCH_4$  is explicitly observed from May to August only in the MT2 and UT layers (Figure 3p-q) and from June to August in the UA layer (Figure 3o). In contrast to previous two regions, EIGP and SI, over the AI region, the seasonal... [92]

Prabir Patra 6/19/2017 3:34 PM

**Moved down [4]:** In contrast to previous two regions, EIGP and SI, over the AI region, the seasonal  $XCH_4$  variation in the LT and MT1 layers together contribute only about 12... [93]

Naveen Negi 6/23/2017 11:14 AM

**Deleted:** Write a para here for Fig. 4 -

Prabir Patra 6/19/2017 3:27 PM

**Formatted:** Highlight

amplitude, and the layers above 600 hPa contribute to the remaining 88%. These findings lead us to conclude that instead of surface emissions, the high CH<sub>4</sub> in the upper tropospheric layers contribute significantly to the formation of seasonal peaks in XCH<sub>4</sub>.

### 3.3 Source of higher CH<sub>4</sub> in the upper troposphere

Using ACTM simulations, we have shown that the higher CH<sub>4</sub> levels in the upper tropospheric region (~400-200 hPa) during the monsoon season contribute significantly to enhanced XCH<sub>4</sub> values over northern Indian regions. The reason of higher mixing ratios in the upper troposphere, as discussed in the former section, can be explained by vertical transport of the CH<sub>4</sub> from the surface, because the vertical transport timescales in the tropical region is much shorter than chemical lifetime of CH<sub>4</sub> of the order of 1-2 years (Patra et al., 2009). Figure 5a-d shows the latitudinal cross section of the convective transport rate (in ppb day<sup>-1</sup>) along with height and vertical velocity (hPa s<sup>-1</sup>) averaged over 83-93°E for different seasons in 2011 (the AGS case). The positive/negative values of convective transport rate and vertical velocity in Figure 5a-d indicate the gain/loss of mass and downward/upward motions, respectively. Rapid updrafts of CH<sub>4</sub>, as indicated by higher negative values of vertical velocity, by deep convection during the monsoon season are aided by the local topography over the IGP region (north of 20°N and east of 79°E in the Indian region). These updrafts lift CH<sub>4</sub>-rich air into the upper tropospheric region (Figure 5g). The CH<sub>4</sub> concentrations at the surface level are decrease by dissipation at an average rate of ~10 ppb day<sup>-1</sup> during Spring-Autumn seasons (Figure 5b-d), and accumulate in the upper troposphere at a similar rate; the height of peak accumulation varies with season.

The horizontal map of CH<sub>4</sub> at 200 hPa is shown with wind vectors in Figure 5i-l for understanding the spatial extent of uplifted CH<sub>4</sub>-rich air over South Asian region. The CH<sub>4</sub>-rich air mass in the upper troposphere (~200 hPa) is then encountered by the anticyclonic winds during the SW monsoon season, which trap CH<sub>4</sub> and leads to widespread CH<sub>4</sub> enhancement covering large part of South Asia, and the CH<sub>4</sub> enhancement extends through the East Asia (Figure 5k). As a result of this, higher CH<sub>4</sub> air masses at upper troposphere, are not only limited over the regions of intense surface emissions as discussed earlier. After the SW monsoon season, the high westerly jet breaks the upper tropospheric anticyclone and the CH<sub>4</sub>-rich air mass shifts over southern India during the autumn season (Figure 5l). In this way, the convective updraft of high-CH<sub>4</sub> air mass, followed by horizontal spreading of the air mass over the larger area by anticyclonic circulation, controls redistribution of CH<sub>4</sub> in the upper troposphere over the northern part of India during SW monsoon season, and over southern peninsula during the early autumn season.

### 4. Conclusions

The dry-air mole fractions of methane (XCH<sub>4</sub>) measured by GHGs Observation SATellite (GOSAT) are analyzed over India and the surrounding seas using the JAMSTEC's atmospheric chemistry-transport model (ACTM). The region of interest (Indian landmass) is divided in to 8 sub-regions, namely, Northeast India (NEI), Eastern India (EI), Eastern IGP (EIGP), Western IGP (WIGP), Central India (CI), Arid India (AI), Western India (WI), Southern Peninsula (SP), and two surrounding oceanic regions, the Arabian Sea (AS) and Bay of Bengal (BOB). The ACTM simulations are conducted using a couple of surface fluxes optimized by the inverse analysis as described in Patra et al. (2013). We have shown that the distinct spatial and temporal variations of XCH<sub>4</sub> observed by GOSAT are not only governed by the heterogeneity in surface emissions, but also due to complex atmospheric transport mechanisms caused by the seasonally varying Asian monsoon. The seasonal XCH<sub>4</sub> patterns often show a fair correlation between emissions and XCH<sub>4</sub> over the regions residing in the northern half of India (north of 15°N: NEI,

Moved (insertion) [4]

[95]

Naveen Negi 7/3/2017 12:02 PM

Deleted: Next, we quantify the contrib [94]

Prabir Patra 6/19/2017 3:42 PM

Deleted: the ...orthern regions of [96]

Naveen Negi 7/3/2017 12:03 PM

Deleted: source ...eason of higher mixi [97]

Prabir Patra 6/19/2017 3:43 PM

Deleted: emitted

Naveen Negi 7/3/2017 12:04 PM

Deleted: emission signal

Prabir Patra 6/19/2017 3:44 PM

Deleted: no ...s much shorter than che [98]

Naveen Negi 7/3/2017 12:05 PM

Deleted: ACTM

Prabir Patra 6/19/2017 3:47 PM

Deleted: ...GS simulation [99]

Naveen Negi 7/3/2017 12:06 PM

Formatted [100]

林田佐智子 6/21/2017 7:45 PM

Deleted: of higher CH<sub>4</sub> surface emissions

Naveen Negi 6/23/2017 11:12 AM

Deleted: can

林田佐智子 6/21/2017 7:46 PM

Deleted:

林田佐智子 6/21/2017 7:46 PM

Formatted

[101]

Naveen Negi 6/23/2017 11:12 AM

Deleted: resulting in cause higher mix [102]

林田佐智子 6/21/2017 7:51 PM

Deleted: ed... at an average rate of ~1 [103]

林田佐智子 6/21/2017 7:57 PM

Deleted: cross-section ...f CH<sub>4</sub> at 200 [104]

Prabir Patra 6/19/2017 3:48 PM

Deleted: further

Naveen Negi 7/3/2017 12:10 PM

Deleted: encountered with the

Naveen Negi 7/3/2017 12:11 PM

Formatted

[105]

Naveen Negi 7/3/2017 12:11 PM

Deleted: extending ...xtends through [106]

Prabir Patra 6/19/2017 3:49 PM

Deleted: over

Naveen Negi 7/3/2017 12:12 PM

Deleted: to

Prabir Patra 6/19/2017 3:49 PM

Deleted: where ...f intense surface so [107]

Naveen Negi 7/3/2017 12:13 PM

Formatted

[108]

Naveen Negi 7/3/2017 12:14 PM

Deleted: elevated levels shift...ver so [109]

Naveen Negi 7/3/2017 12:14 PM

Deleted: and cause higher CH<sub>4</sub> mixing [110]

Prabir Patra 6/19/2017 3:50 PM

Deleted: Like in Section 3.2, previous [111]

Naveen Negi 6/23/2017 11:06 AM

Formatted

[112]

Prabir Patra 6/19/2017 3:59 PM

Deleted: were closely...re analyzed h [113]

Naveen Negi 7/3/2017 12:19 PM

Prabir Patra 6/19/2017 4:00 PM

[114]

Naveen Negi 7/3/2017 12:19 PM

Prabir Patra 6/19/2017 4:01 PM

[115]

Naveen Negi 7/3/2017 12:20 PM

Prabir Patra 6/19/2017 4:02 PM

[116]



EI, EIGP, WIGP, CI, WI, AI), which would imply XCH<sub>4</sub> levels are closely associated with the distribution of emissions on the Earth's surface. However, detailed analysis of transport and emission using ACTM over these regions (except for the AI) reveal that about 40% of seasonal enhancement in the observed XCH<sub>4</sub> can be attributed to the lower tropospheric layer (below 600 hPa). The lower tropospheric layer are either affected by the surface emissions, e.g., in the northern India regions or seasonal changes in horizontal winds due to monsoon for the SP, AS and BoB regions. Up to 40% of the seasonal CH<sub>4</sub> enhancement is found to come from the uplifted air mass in to the 600-200 hPa height layer over northern regions in India. In contrast, over semi-arid AI region, as much as ~88% contributions to the XCH<sub>4</sub> seasonal cycle amplitude come from the height above 600 hPa, and only ~12% are contributed by the atmosphere below 600 hPa. The primary cause of the higher contributions from above 600 hPa over the northern Indian region is the characteristic air mass transport mechanisms in the Asian monsoon region. The persistent deep convection during the southwest (SW) monsoon season (June-August) causes strong updrafts of CH<sub>4</sub> from the surface to upper troposphere, which is then distributed by anticyclonic winds over wider area of northern India. These transport mechanisms caused the elevated CH<sub>4</sub> mixing ratios in the upper troposphere hence contributed significantly to the seasonal peak in XCH<sub>4</sub> over northern India. In contrast to these regions, over the SP region, the major contributions (about 60%) to XCH<sub>4</sub> seasonal amplitude come from the lower atmosphere (~1000-600 hPa). Both transport and chemistry dominate in the lower troposphere over SP region and thus the formation of XCH<sub>4</sub> seasonal cycle is not consistent with the seasonal cycle local emissions. As the upper level anticyclone does not cover the southern Indian region in the active phase of southwest monsoon, no enhancement in XCH<sub>4</sub> is observed over the southern peninsular region.

This study shows that ACTM simulations are generally capturing the GOSAT observed seasonal and spatial XCH<sub>4</sub> variability and points to a comprehensive understanding of emissions, chemistry and transport of CH<sub>4</sub> over one of the strongest global monsoonal regions is extremely important for perceptive insights into the source-receptor relationships. Our results provide strong support for performing inverse modelling of CH<sub>4</sub> surface emissions in the future using XCH<sub>4</sub> observations and ACTM forward simulation.

#### Acknowledgements

The Environment Research and Technology Development Fund (A2-I502) of the Ministry of the Environment, Japan, supported this research. The data used for preparing the figures, and table could be available on request. The corresponding author may be contacted for the same.

#### References

- Baker, A. K., Schuck, T. J., Brenninkmeijer, C. A. M., Rauthe-Schöch, A., Slemr, F., van Velthoven, P. F. J., and Lelieveld, J.: Estimating the contribution of monsoon-related biogenic production to methane emissions from South Asia using CARIBIC observations, *Geophys. Res. Lett.*, 39, L10813, doi:10.1029/2012GL051756, 2012.
- Crutzen, P.J., Aselmann, I., and Seiler, W.: Methane production by domestic animals, wild ruminants other herbivorous fauna and humans. *Tellus* 38B, 271-284, doi:10.1111/j.1600-0889.1986.tb00193.x, 1986.
- Cao, M., Gregson, K., and Marshall, S.: Global methane emission from wetlands and its sensitivity to climate change. *Atmos. Environ.* 32 (19), 3293-3299, doi:10.1016/S1352-2310 (98) 00105-8, 1998.

Prabir Patra 6/19/2017 4:04 PM

Deleted: ies...XCH<sub>4</sub> levels are closely... [117]

Naveen Negi 7/3/2017 12:21 PM

Deleted: . However, detailed analysis of transport and emission using ACTM reveal that only less than 40% of seasonal enhancement in the observed XCH<sub>4</sub> can be attributed to surface emissions over these regions except AI, as only this amount of CH<sub>4</sub> enhancement is available in the lower troposphere (below 600 hPa), which is directly affected by the surface emissions. In fact,

Prabir Patra 6/19/2017 4:06 PM

Deleted: ~

Naveen Negi 7/3/2017 12:21 PM

Deleted: -60

Prabir Patra 6/19/2017 4:07 PM

Deleted: in ...the uplifted air mass bet... [118]

Naveen Negi 7/3/2017 12:22 PM

Deleted: these regions

Prabir Patra 6/19/2017 4:08 PM

Deleted: ation...mechanisms in the A... [119]

Naveen Negi 7/3/2017 12:24 PM

Deleted: the ...orthern Indian ... [120]

Prabir Patra 6/19/2017 4:10 PM

Deleted: , as a result of it,

Naveen Negi 7/3/2017 12:25 PM

Formatted: Subscript

Naveen Negi 7/3/2017 12:25 PM

Deleted: variation ...ycle is not consis... [121]

Prabir Patra 6/19/2017 4:10 PM

Deleted:

Naveen Negi 6/23/2017 12:17 PM

Deleted: s

Prabir Patra 6/19/2017 4:10 PM

Deleted: its...active phase during the... [122]

Naveen Negi 7/3/2017 12:23 PM

Deleted: s that s are generally the s to aemissions, chemistry and Our results provide strong support foring - ... [123]

Prabir Patra 6/19/2017 4:01 PM

Deleted: Most satellite sensors are designed to provide total columnar observations of atmospheric chemical species. This study opens a new window for interpreting columnar measurements for surface emissions of greenhouse gases particularly over the Asian monsoon region where characteristic meteorology dominates, and should aid users in carefully applying scientific data in the future to not draw erroneous conclusions.

- Chandra, N., Venkataramani, S., Lal, S., Sheel, V. & Pozzer, A.: Effects of convection and long-range transport on the distribution of carbon monoxide in the troposphere over India. *Atmospheric Pollution Research* 7, 775 – 785, doi:10.1016/j.apr.2016.03.005, 2016.
- Dlugokencky, E. J., Nisbet, E. G., Fisher, R., and Lowry, D.: Global atmospheric methane: Budget, changes, and dangers, *Philos. Trans. R. Soc. London, Ser. A*, 369, 2058–2072, 2011.
- EDGAR42FT, 2013: Global emissions EDGAR v4.2FT2010 (October 2013). [Available at <http://edgar.jrc.ec.europa.eu/overview.php?v=42FT2010>.]
- Fung, I., John, J., Lerner, J., Matthews, E., Prather, M., Steele, L. P., and Fraser, P. J.: Three-dimensional model synthesis of the global methane cycle, *J. Geophys. Res.*, 96, 13033–13065, doi:10.1029/91JD01247, 1991
- Frankenberg, C., P. Bergamaschi, A. Butz, S. Houweling, J. F. Meirink, J. Notholt, A. K. Petersen, H. Schrijver, T. Warneke, and I. Aben (2008), Tropical methane emissions: A revised view from SCIAMACHY onboard ENVISAT, *Geophys. Res. Lett.*, 35(15), doi:10.1029/2008gl034300.
- Frankenberg, C., I. Aben, P. Bergamaschi, E. J. Dlugokencky, R. van Hees, S. Houweling, P. van der Meer, R. Snel, and P. Tol (2011), Global column-averaged methane mixing ratios from 2003 to 2009 as derived from SCIAMACHY: Trends and variability, *J. Geophys. Res.*, 116(D4), doi:10.1029/2010jd014849.
- Hayashida, S., Ono, A., Yoshizaki, S., Frankenberg, C., Takeuchi, W., Yan, X.: Methane concentrations over Monsoon Asia as observed by SCIAMACHY: Signals of methane emission from rice cultivation. *Remote Sensing of Environment* 139, 246–256, doi: 10.1016/j.rse.2013.08.008, 2013.
- Kuze, A., Suto, H., Nakajima, M., and Hamazaki, T.: Thermal and near infrared sensor for carbon observation Fourier transform spectrometer on the Greenhouse Gases Observing Satellite for greenhouse gases monitoring. *Appl. Opt.* 48, 6716–6733, doi: 10.1364/AO.48.006716, 2009.
- Kar, J., Deeter, M. N., Fishman, J., Liu, Z., Omar, A., Creilson, J. K., Trepte, C. R., Vaughan, M. A., and Winker, D. M.: Wintertime pollution over the Eastern Indo-Gangetic Plains as observed from MOPITT, CALIPSO and tropospheric ozone residual data, *Atmos. Chem. Phys.*, 10, 12273–12283, doi:10.5194/acp-10-12273-2010, 2010.
- Kavitha, M. and Nair, P. R.: Region-dependent seasonal pattern of methane over Indian region as observed by SCIAMACHY. *Atmospheric Environment* 131, 316–325, doi:10.1016/j.atmosenv.2016.02.008, 2016.
- Lal, S., Venkataramani, S., Chandra, N., Cooper, O. R., Brioude, J., and Naja, M.: Transport effects on the vertical distribution of tropospheric ozone over western India, *J. Geophys. Res. Atmos.*, 119, 10,012–10,026, doi:10.1002/2014JD021854, 2014.
- Matthews, E., and Fung, I.: Methane emissions from natural wetlands: Global distribution, area and environmental characteristics of sources. *Global Biogeochem. Cycles* 1, 61–86, 1987.
- Minami, K., and Neue, H. U.: Rice paddies as a methane source. *Clim. Change Lett.* 27, 13–26, doi:10.1007/BF01098470, 1994.
- Morino, I., Uchino, O., Inoue, M., Yoshida, Y., Yokota, T., Wennberg, P. O., Toon, G. C., Wunch, D., Roehl, C. M., Notholt, J., Warneke, T., Messerschmidt, J., Griffith, D. W. T., Deutsch, N. M., Sherlock, V., Connor, B., Robinson, J., Sussmann, R., and Rettinger, M.: Preliminary validation of column-average volume mixing ratios of carbon dioxide and methane retrieved from GOSAT short-wavelength infrared spectra. *Atmos. Meas. Tech.*, 4, 1061–1076, doi:10.5194/amt-4-1061-2011, 2011.
- Myhre, G., Shindell, D., Bréon, F.-M., Collins, W. Fuglestad, J., Huang, J., Koch, D. Lamarque, J.-F., Lee, D., Mendoza, B., Nakajima, T., Robock, A., Stephens, G. Takemura, T., and Zhang, H.: Anthropogenic and natural radiative forcing, in:

林田佐智子 6/21/2017 4:24 PM

Formatted: Font:10 pt

林田佐智子 6/21/2017 4:25 PM

Formatted: Indent: Left: 0", Hanging: 2 ch, First line: -2 ch, Line spacing: 1.5 lines

林田佐智子 6/21/2017 4:20 PM

Deleted: Frankenberg, C., Meirink, J. F., van Weele, M., Platt, U., and Wagner, T.: Assessing methane emissions from global space-borne observations, *Science*, 308, 1010–1014, 2005. ... [124]

- Climate Change 2013: The Physical Science Basis, Fifth Assessment Report of the Intergovernmental Panel on Climate Change, edited by: Stocker, T. F. et al., Cambridge University Press, Cambridge, UK, New York, NY, USA, 659–740, 2013.
- Olivier, J. G. J., Aardenne, J.A.V., Dentener, F., Ganzeveld, L. N., Peters, J.A.H.W.: Recent trends in global greenhouse gas emissions: Regional trends and spatial distribution of key sources, in: Non-CO<sub>2</sub> Greenhouse Gases (NCGG-4), edited by: van Amstel, A., 325–330, Millpress, Rotterdam, Netherlands, 2005.
- Onogi, K., Tsutsui, J., Koide, H., Sakamoto, M., Kobayashi, S., Hatsushika, H., Matsumoto, T., Yamazaki, N., Kamahori, H., Takahashi, K., Kadokura, S., Wada, K., Kato, K., Oyama, R., Ose, T., Mannoji, N., and Taira, R.: The JRA-25 reanalysis, *J. Meteorol. Soc. Jpn.*, 85, 369–432, 2007.
- Olsen, K. S., Strong, K., Walker, K. A., Boone, C. D., Raspollini, P., Plieninger, J., Bader, W., Conway, S., Grutter, M., Hannigan, J. W., Hase, F., Jones, N., de Mazière, M., Notholt, J., Schneider, M., Smale, D., Sussmann, R., and Saitoh, N.: Comparison of the GOSAT TANSO-FTS TIR CH<sub>4</sub> volume mixing ratio vertical profiles with those measured by ACE-FTS, ESA MIPAS, IMK-IAA MIPAS, and 16 NDACC stations, *Atmos. Meas. Tech. Discuss.*, doi:10.5194/amt-2017-6, in review, 2017.
- Park, M., Randel, W. J., Kinnison, D. E., Garcia, R. R., and Choi, W.: Seasonal variation of methane, water vapor, and nitrogen oxides near the tropopause: Satellite observations and model simulations. *Journal of Geophysical Research: Atmospheres* 109, doi: 10.1029/2003JD003706. D03302, 2004.
- Patra, P. K., Takigawa, M., Ishijima, K., Choi, B. C., Cunnold, D., Dlugokencky, E. J., Fraser, P., A. J., Gomez-Pelaez, Goo, T. Y., Kim, J. S., Krummel, P., Langenfelds, R., Meinhardt, F., Mukai, H., O'Doherty, S., Prinn, R. G., Simmonds, P., Steele, P., Tohjima, Y., Tsuboi, K., Uhse, K., Weiss, R., Worthy, D., and Nakazawa, T.: Growth rate, seasonal, synoptic, diurnal variations and budget of methane in lower atmosphere, *J. Meteorol. Soc. Jpn.*, 87(4), 635–663, doi: 10.2151/jmsj.87.635, 2009.
- Patra, P. K., Houweling, S., Krol, M., Bousquet, P., Belikov, D., Bergmann, D., Bian, H., Cameron-Smith, P., Chipperfield, M. P., Corbin, K., Fortems-Cheiney, A., Fraser, A., Gloor, E., Hess, P., Ito, A., Kawa, S. R., Law, R. M., Loh, Z., Maksyutov, S., Meng, L., Palmer, P. I., Prinn, R. G., Rigby, M., Saito, R., and Wilson, C.: TransCom model simulations of CH<sub>4</sub> and related species: Linking transport, surface flux and chemical loss with CH<sub>4</sub> variability in the troposphere and lower stratosphere, *Atmos. Chem. Phys.*, 11, 12,813–12,837, doi:10.5194/acp-11-12813-2011, 2011a.
- Patra, P. K., Niwa, Y., Schuck, T. J., Brenninkmeijer, C. A. M., Machida, T., Matsueda, H., and Sawa, Y.: Carbon balance of South Asia constrained by passenger aircraft CO<sub>2</sub> measurements, *Atmos. Chem. Phys.*, 11, 4163–4175, doi:10.5194/acp-11-4163-2011, 2011b.
- Patra, P. K., Canadell, J. G., Houghton, R. A., Piao, S. L., Oh, N.-H., Ciais, P., Manjunath, K. R., Chhabra, A., Wang, T., Bhattacharya, T., Bousquet, P., Hartman, J., Ito, A., Mayorga, E., Niwa, Y., Raymond, P. A., Sarma, V. V. S. S., and Lasco, R.: The carbon budget of South Asia, *Biogeosciences*, 10, 513–527, doi:10.5194/bg-10-513-2013, 2013.
- Patra, P. K., Krol, M. C., Montzka, S. A., Arnold, T., Atlas, E. L., Lintner, B. R., Stephens, B. B., Xiang, B., Elkins, J. W., Fraser, P. J., Ghosh, A., Hints, E. J., Hurst, D. F., Ishijima, K., Krummel, P. B., Miller, B. R., Miyazaki, K., Moore, F. L., Mühle, J., O'Doherty, S., Prinn, R. G., Steele, L. P., Takigawa, M., Wang, H. J., Weiss, R. F., Wofsy, S. C., and Young, D.: Observational evidence for interhemispheric hydroxyl parity, *Nature*, 513, 219–223, 2014.
- Patra, P. K., Saeki, T., Dlugokencky, E. J., Ishijima, K., Umezawa, S. T., Ito, A., Aoki, S., Morimoto, S., Kort, E. A., Crotwell, A., Kumar, R., and Nakazawa, T.: Regional methane emission estimation based on observed atmospheric concentrations (2002–2012), *J. Meteorol. Soc. Jpn.*, 94(1), 91–113, doi:10.2151/jmsj.2016-006, 2016.

- Rao, Y. P.: Southwest monsoon: Synoptic Meteorology, Meteor. Monogr., No. 1/1976, India Meteorological Department, 367 pp, 1976.
- Randel, W. J. and Park, M.: Deep convective influence on the Asian summer monsoon anticyclone and associated tracer variability observed with Atmospheric Infrared Sounder (AIRS). *J. Geophys. Res.* 111, doi: 10.1029/2005JD006490, 2006.
- Sugimoto, A., Inoue, T., Kirtibutr, N. and Abe, T.: Methane oxidation by termite mounds estimated by the carbon isotopic composition of methane. *Glob. Biogeochem. Cycles* 12 (4), 595-605, doi:10.1029/98GB02266, 1998.
- Shindell, D. T., Faluvegi, G., Koch, D. M., Schmidt, G. A., Unger, N., Bauer, S. E.: Improved attribution of climate forcing to emissions, *Science*, 326, 716-718, doi: 10.1126/science.1174760, 2009.
- Schuck, T. J., Ishijima, K., Patra, P. K., Baker, A. K., Machida, T., Matsueda, H., Sawa, Y., Umezawa, T., Brenninkmeijer, C. A. M., and Lelieveld, J.: Distribution of methane in the tropical upper troposphere measured by CARIBIC and CONTRAIL aircraft, *J. Geophys. Res.*, 117, D19304, doi:10.1029/2012JD018199, 2012.
- Spivakovsky, C. M., Logan, J. A., Montzka, S. A., Balkanski, Y. J., Foreman-Fowler, M., Jones, D. B. A., Horowitz, L. W., Fusco, A. C., Brenninkmeijer, C. A. M., Prather, M. J., Wofsy, S. C., and McElroy, M. B.: Three-dimensional climatological distribution of tropospheric OH: update and evaluation, *J. Geophys. Res.*, 105, 8931-8980, doi:10.1029/1999JD901006, 2000.
- Worden, J. R., Turner, A. J., Bloom, A., Kulawik, S. S., Liu, J., Lee, M., Weidner, R., Bowman, K., Frankenberg, C., Parker, R., and Payne, V. H.: Quantifying lower tropospheric methane concentrations using GOSAT near-IR and TES thermal IR measurements, *Atmos. Meas. Tech.*, 8, 3433-3445, doi:10.5194/amt-8-3433-2015, 2015.
- [Wunch, D., G. C. Toon, J.-F. L. Blavier, R. A. Washenfelder, J. Notholt, B. J. Connor, D. W. T. Griffith, V. Sherlock, and P. O. Wennberg, The total carbon column observing network, \*Phil. Trans. Royal Society - Series A\*, 369, 2087-2112, doi:10.1098/rsta.2010.0240, 2011.](#)
- Xiong, X., Houweling, S., Wei, J., Maddy, E., Sun, F., and Barnett, C.: Methane plume over south Asia during the monsoon season: satellite observation and model simulation, *Atmos. Chem. Phys.*, 9, 783-794, doi:10.5194/acp-9-783-2009, 2009.
- [Yoshida, Y., Y. Ota, N. Eguchi, N. Kikuchi, K. Nobuta, H. Tran, I. Morino, and T. Yokota \(2011\), Retrieval algorithm for CO<sub>2</sub> and CH<sub>4</sub> column abundances from short-wavelength infrared spectral observations by the Greenhouse gases observing satellite, \*Atmospheric Measurement Techniques\*, 4\(4\), 717-734, doi:10.5194/amt-4-717-2011.](#)
- Yoshida, Y., Kikuchi, N., Morino, I., Uchino, O., Oshchepkov, S., Bril, A., Saeki, T., Schutgens, N., Toon, G. C., Wunch, D., Roehl, C. M., Wennberg, P. O., Griffith, D. W. T., Deutscher, N. M., Warneke, T., Notholt, J., Robinson, J., Sherlock, V., Connor, B., Rettinger, M., Sussmann, R., Ahonen, P., Heikkinen, P., Kyrö, E., Mendonca, J., Strong, K., Hase, F., Dohe, S., and Yokota, T.: Improvement of the retrieval algorithm for GOSAT SWIRXCO<sub>2</sub> and XCH<sub>4</sub> and their validation using TCCON data, *Atmos. Meas. Tech.*, 6, 1533-1547, doi:10.5194/amt-6-1533-2013, 2013.
- Yan, X., Akiyama, H., Yagi, K., and Akimoto, H.: Global estimations of the inventory and mitigation potential of methane emissions from rice cultivation conducted using the 2006 Intergovernmental Panel on Climate Change Guidelines, *Global Biogeochem. Cycles*, 23, GB2002, doi:10.1029/2008GB003299, 2009.
- Zou, M., Xiong, X., Saitoh, N., Warner, J., Zhang, Y., Chen, L., Weng, F., and Fan, M.: Satellite observation of atmospheric methane: intercomparison between AIRS and GOSAT TANSO-FTS retrievals, *Atmos. Meas. Tech.*, 9, 3567-3576, doi:10.5194/amt-9-3567-2016, 2016.

Naveen Negi 6/22/2017 10:52 AM

Deleted: &lt;sub&gt;

Naveen Negi 6/22/2017 10:52 AM

Formatted: Subscript

Naveen Negi 6/22/2017 10:52 AM

Deleted: &lt;/sub&gt;

Naveen Negi 6/22/2017 10:52 AM

Deleted: &lt;sub&gt;

Naveen Negi 6/22/2017 10:53 AM

Formatted: Subscript

Naveen Negi 6/22/2017 10:52 AM

Deleted: &lt;/sub&gt;



Figures.

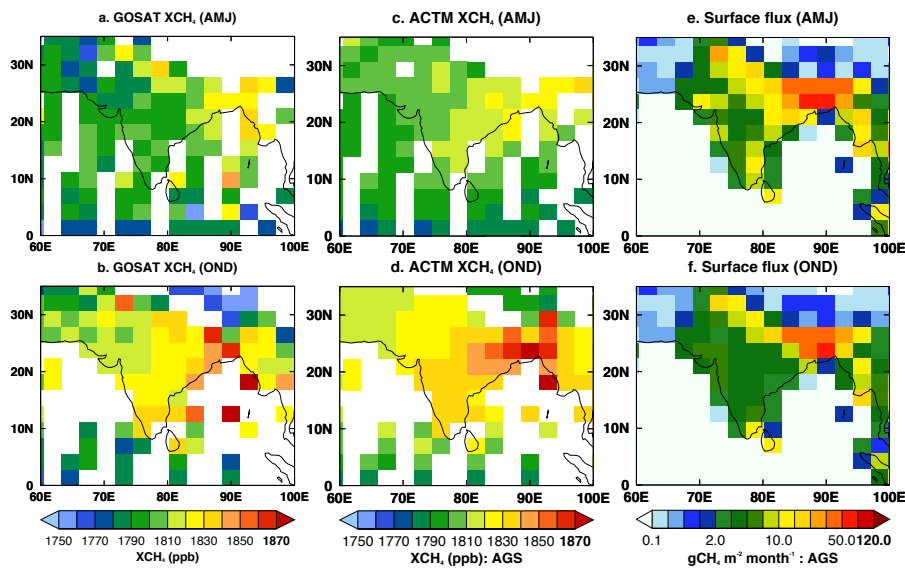

**Figure 1:** Average seasonal distributions (from 2011 to 2014) of XCH<sub>4</sub> obtained from GOSAT observations (a-b), ACTM simulations (c-d) and CH<sub>4</sub> emission consisting of all the natural and anthropogenic emissions (e-f: ACTM\_AGS case) over the Indian region. Optimized emissions are shown from a global inversion of surface CH<sub>4</sub> concentrations (Patra et al., 2016) and multiplied by a constant factor of 12 for a clear visualization. The ACTM is first sampled at the location and time of GOSAT observations and then seasonally averaged. The white spaces in panels (a-d) are due to the missing data caused by satellite retrieval limitations from cloud cover.

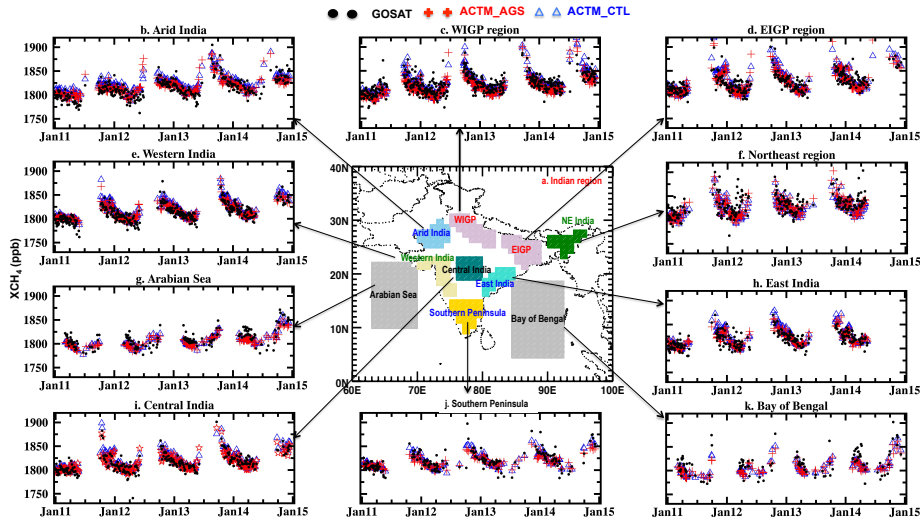

Figure 2: (a) The map of the regional divisions (shaded) for the time series analysis. (b-l) Time series of XCH<sub>4</sub> over the selected regions (shown in map) as obtained from GOSAT and simulated by ACTM for two different emission scenarios, namely, ACTM\_ags and ACTM\_ctl. The gaps are due to the missing observational data.

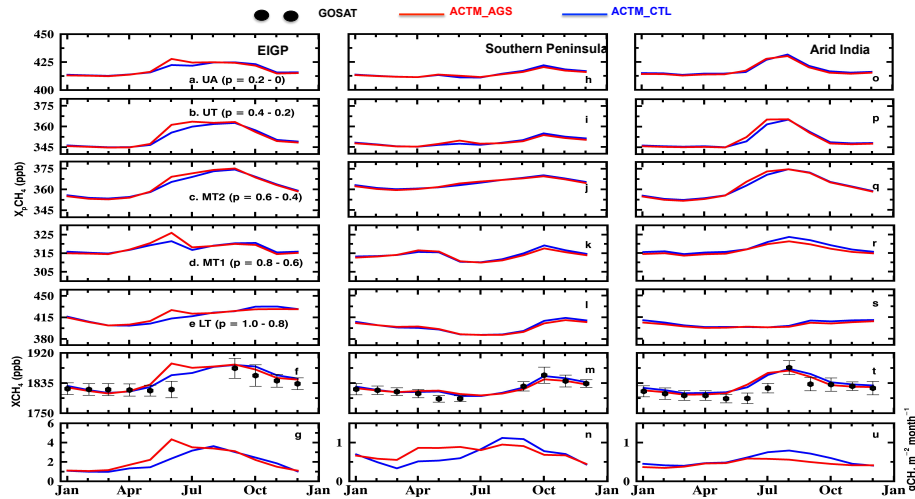

Figure 3: The bottom panels show the monthly mean climatologies of the total optimized CH<sub>4</sub> emissions (panels g, n, u); estimated after performing the global inverse analysis (Patra et al., 2016). The second bottom panels show XCH<sub>4</sub> obtained from the GOSAT observations (black circles in panels f, m, t) and ACTM simulations (panels f, m, t) over the Eastern IGP (first column), Southern Peninsula (second column) and Arid India region (third column). Monthly climatology is based on the monthly mean values for the period of 2011-2014 for all the values. The error bars in the GOSAT monthly mean values depict the 1-sigma standard deviations for the corresponding months (f, m, t). The 1-sigma values are not plotted for the model simulations to maintain figure clarity. Simulations are based on two different emission scenarios namely ACTM\_CTL (blue lines) and ACTM\_AGS (red lines) based on the different combinations of emissions. The upper five panels show the monthly climatology of partial columnar methane (denoted by  $X_pCH_4$ ) calculated at five different partial sigma-pressure layers; 1.0-0.8 (e, l, s), 0.8-0.6 (d, k, r), 0.6-0.4 (c, j, q), 0.4-0.2 (b, i, p) and 0.2-0.0 (a, h, n). Please note that the y scales in the emission plots over southern peninsula and Arid India (n and u) are different from over the EIGP region (g).

Naveen Negi 7/3/2017 12:26 PM

Deleted: x

Naveen Negi 7/3/2017 12:26 PM

Deleted: than

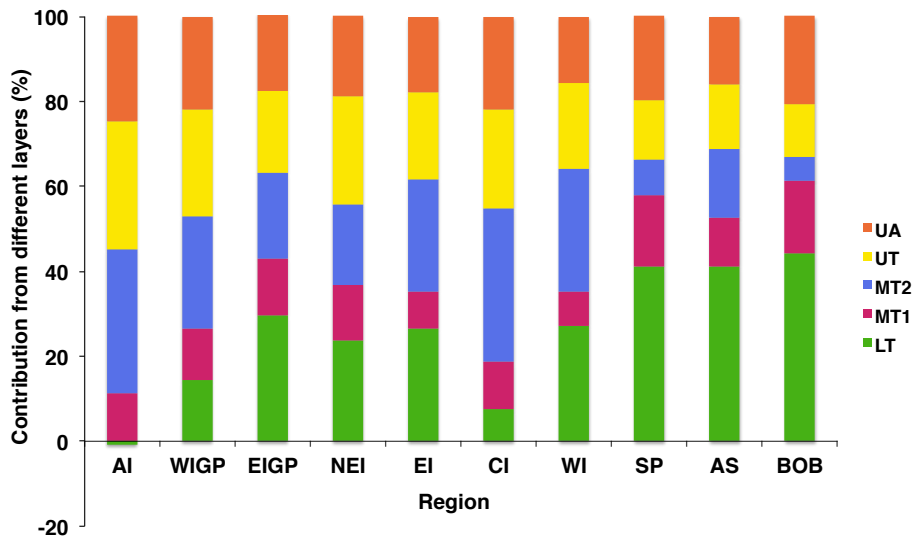

Figure 4: Contributions of partial columns in the seasonal amplitude of  $XCH_4$  over selected regions for AGS case. Differences in the  $X_pCH_4$ , calculated at the same time as the maxima and minima of the seasonal  $XCH_4$  cycle, are used to calculate the percentage contributions of respective partial columns in the seasonal amplitude of  $XCH_4$ .

Naveen Negi 7/3/2017 12:26 PM

Deleted: cd



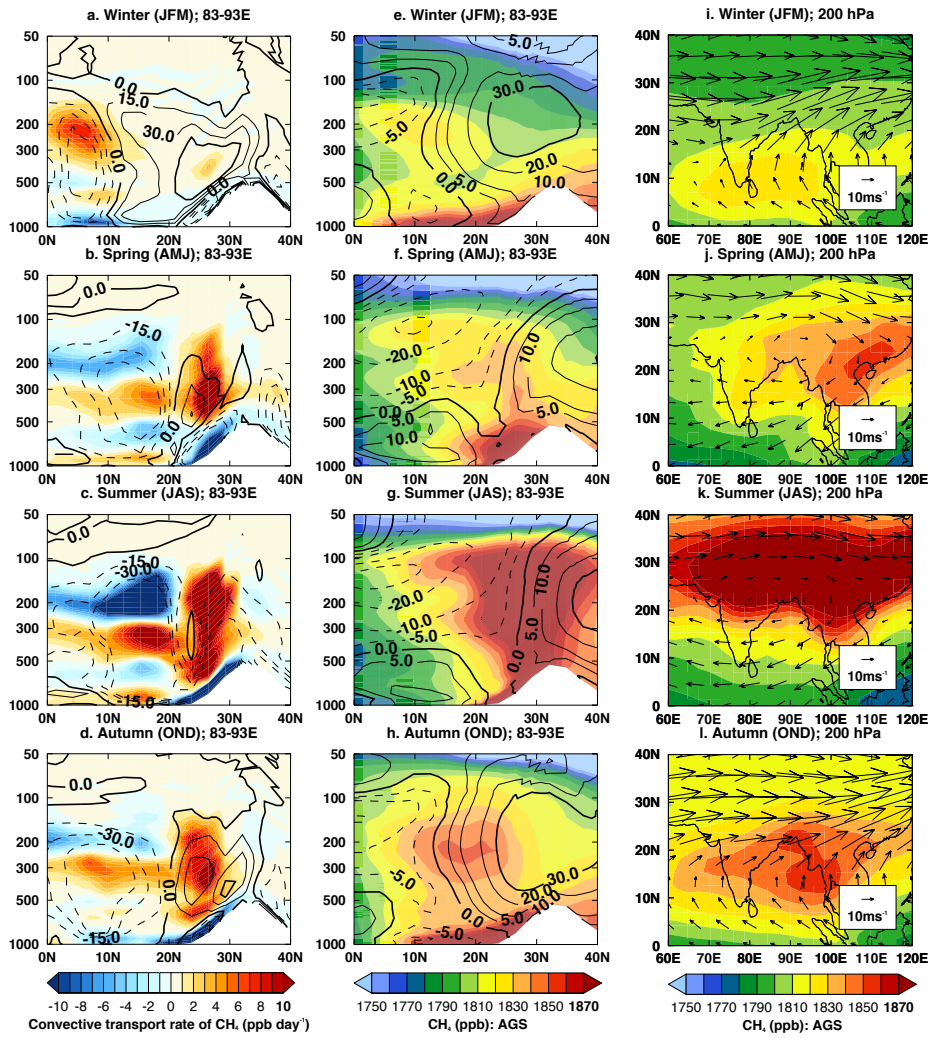

**Figure 5:** Vertical structure of seasonally averaged  $\text{CH}_4$  transport rate due to the convection (a-d, in  $\text{ppb day}^{-1}$ ) and  $\text{CH}_4$  mixing ratios (e-h from AGS scenarios) averaged over  $83\text{--}93^\circ\text{E}$  for the year 2011. Positive and negative transport rate values represent the accumulation and dissipation of mass, respectively. The contour lines in the first (a-d) and second (e-h) columns depict the average omega velocity (in  $\text{hPa s}^{-1}$ ) and u wind component, respectively for the same period. The solid contour lines show the positive values and dotted lines show negative values. Positive and negative values of the omega velocity represent downward and upward motions, respectively. The zero value of u wind shows wind is pure either southerly or northerly. White spaces in zonal-mean plots (a-h) show the missing data due to orography. The rightmost column depicts the maps of averaged  $\text{CH}_4$  and wind vectors (in  $\text{m s}^{-1}$ ; arrow) during all the four seasons in 2011 at 200 hPa height (i-l).

Naveen Negi 7/3/2017 12:27 PM

Deleted: of
